# Supplementary material for: Calcitriol Protects against Acetaminophen-Induced Hepatotoxicity in Mice
Source: MDPI journal article supplement (doi:10.3390/biomedicines11061534), 2023-05-25
Supplement: s1 [file s1]

## Supplementary Information

**Supplementary Table S1.** An organ index for the liver of mice in each group.

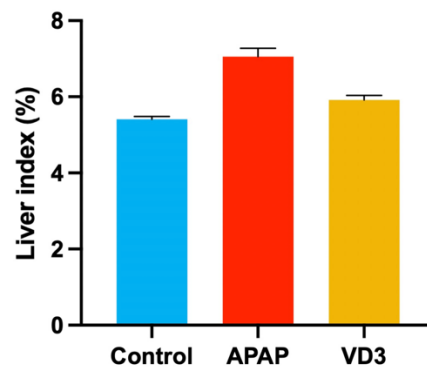

| Group   | Number | Mean body weight (g) | Mean liver weight (g) | Liver index (%) | p-value |
|---------|--------|----------------------|-----------------------|-----------------|---------|
| Control | 8      | 34.13 ± 0.64         | 1.85 ± 0.05           | 5.41 ± 0.07     | <0.001  |
| APAP    | 6      | 35.17 ± 2.64         | 2.48 ± 0.12           | 7.05 ± 0.22     |         |
| VD3     | 8      | 33.50 ± 1.69         | 1.98 ± 0.10           | 5.91 ± 0.12     |         |
